# Supplementary material for: Targeting endothelin 1 receptor-miR-200b/c-ZEB1 circuitry blunts metastatic progression in ovarian cancer
Source: PubMed Central journal article supplement (PMC7666224; doi:10.1038/s42003-020-01404-3), 2020-11-13
Supplement: 42003_2020_1404_MOESM1_ESM.pdf [file 42003_2020_1404_MOESM1_ESM.pdf]

## **Supplementary Information**

**Targeting endothelin 1 receptor-miR-200b/c-ZEB1 circuitry blunts metastatic progression in ovarian cancer**

Rosanna Sestito, Roberta Cianfrocca, Piera Tocci, Laura Rosanò, Andrea Sacconi, Giovanni Blandino and Anna Bagnato

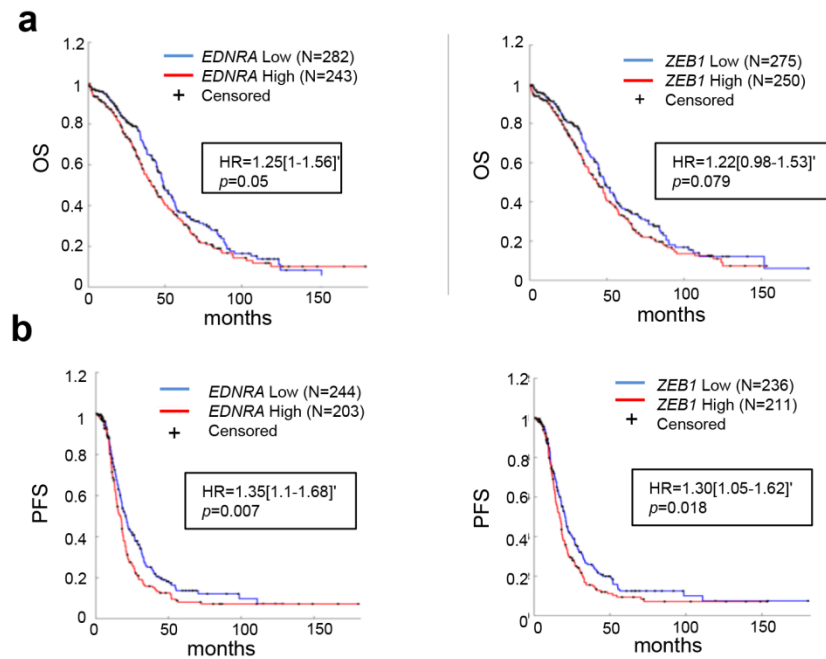

**Supplementary Figure 1. High levels of  $ET_A R$  or  $ZEB1$  correlate with a poor prognosis in ovarian cancer patients. a** Kaplan-Meier curves of overall survival (OS) of 525 patients from TCGA subdivided in high (z score > 1.5, red line) and low (z score < 1.5, blue line) expression levels of *EDNRA* ( $ET_A R$ ) or *ZEB1* genes. **b** Kaplan-Meier curves of progression free survival (PFS) of 447 patients from TCGA subdivided as in **a**.

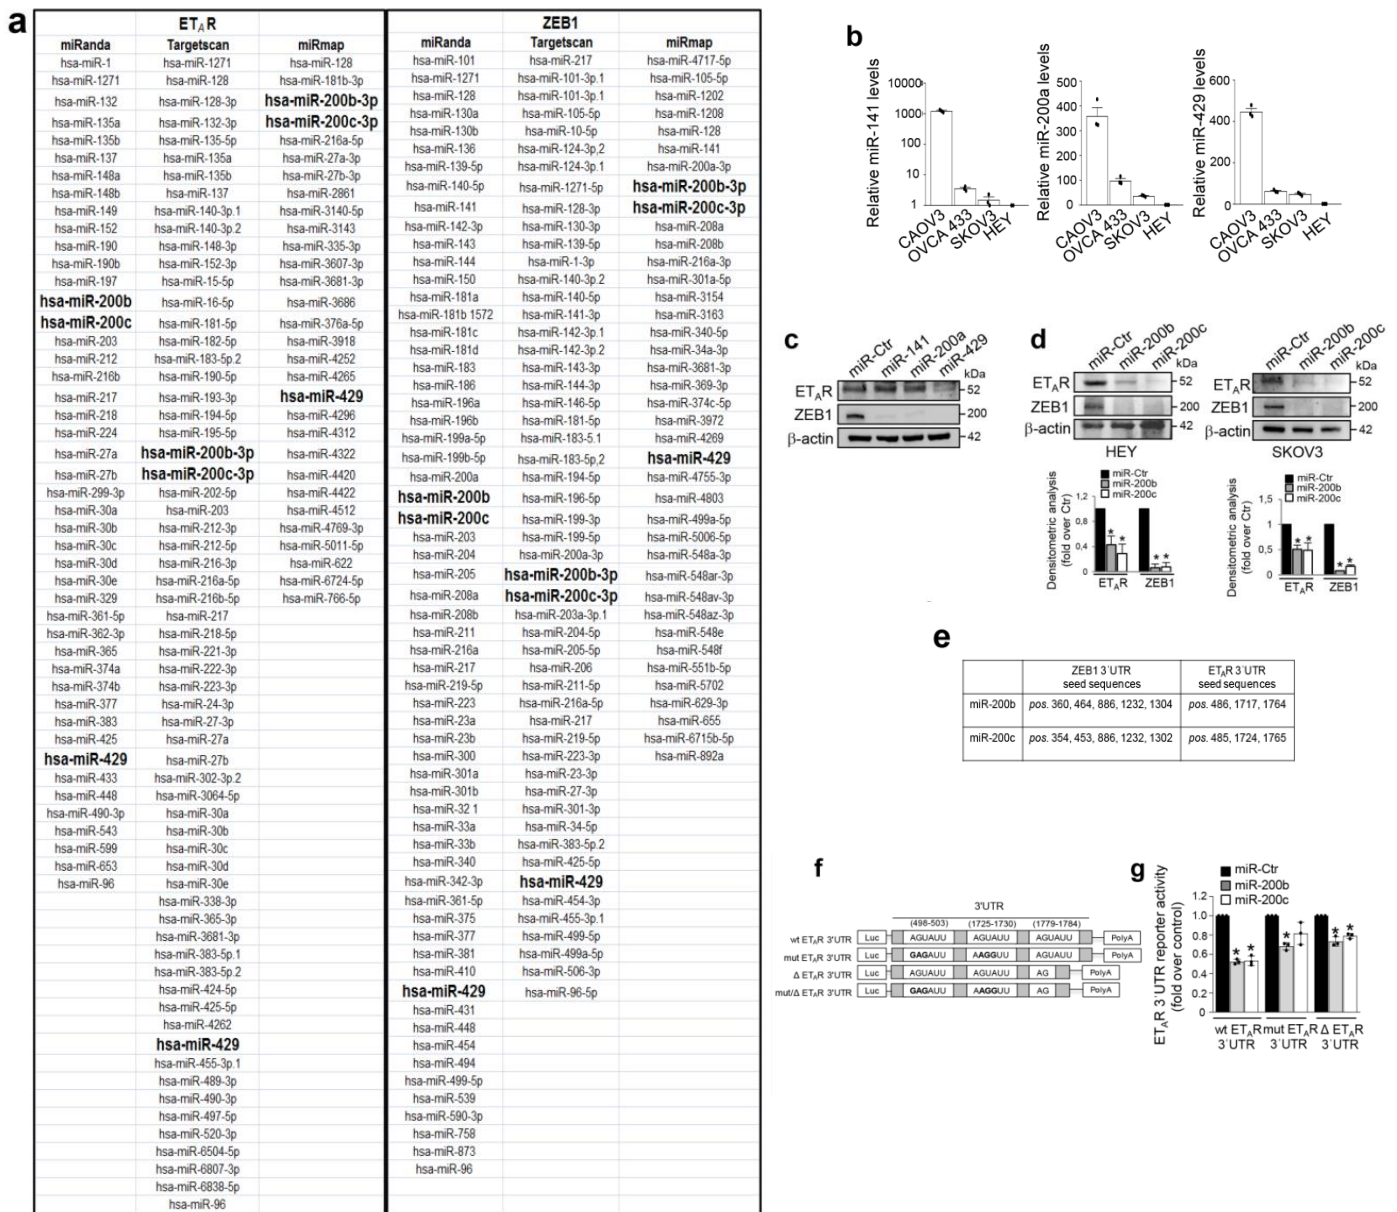

**Supplementary Figure 2. ET<sub>A</sub>R and ZEB1 are putative targets of miR-200b/c.** **a** miRNAs predicted to target the 3'UTR of ET<sub>A</sub>R or the 3'UTR of ZEB1 by using miRanda, TargetScan and miRmap bioinformatic tools. **b** miR-141, miR-200a and miR-429 expression levels in CAOV3, OVCA 433, SKOV3 and HEY cell lines analyzed by qRT-PCR and normalized to U6. **c** WB analysis of ET<sub>A</sub>R and ZEB1 protein expression in HEY cells transfected with mimic-miRNA Ctr (miR-Ctr), mimic-miR-141 (miR-141) or mimic-miR-200a (miR-200a) or mimic-miR-429 (miR-429) for 48h. β-actin is used as loading control. **d** WB analysis of ET<sub>A</sub>R and ZEB1 protein expression in HEY and SKOV3 cells transfected with mimic-miR-Ctr, -miR-200b, or -miR-200c for 48h. β-actin is used as loading control. Graph represents the densitometric analysis of ET<sub>A</sub>R and

ZEB1 protein expression normalized to  $\beta$ -actin. Values are the mean  $\pm$ SD expressed as fold induction (\*,  $p < 0.04$  vs miR-Ctr). **e** miR-200b/c seed binding sequences on the 3'UTR of ZEB1 and ET<sub>A</sub>R. **f** Schematic representation of the ET<sub>A</sub>R 3'UTR reporter plasmids employed in the luciferase assays: wt ET<sub>A</sub>R 3'UTR, mut ET<sub>A</sub>R 3'UTR (carrying mutations in pos. 498-500 and 1726-1728),  $\Delta$ ET<sub>A</sub>R 3'UTR (carrying a deletion of the region 1781-1784) and mut/ $\Delta$ ET<sub>A</sub>R 3'UTR (carrying the mutations in pos. 498-500 and 1726-1728 and a deletion of the region 1781-1784). **g** Luciferase activity in HEY cells co-transfected with mimic-miR-Ctr, -miR-200b or -miR-200c together with the wt ET<sub>A</sub>R 3'UTR, mut ET<sub>A</sub>R 3'UTR or  $\Delta$ ET<sub>A</sub>R 3'UTR reporter plasmids. Values are the mean  $\pm$ SD expressed as fold induction (n=3; \*,  $p < 0.001$  vs Ctr).

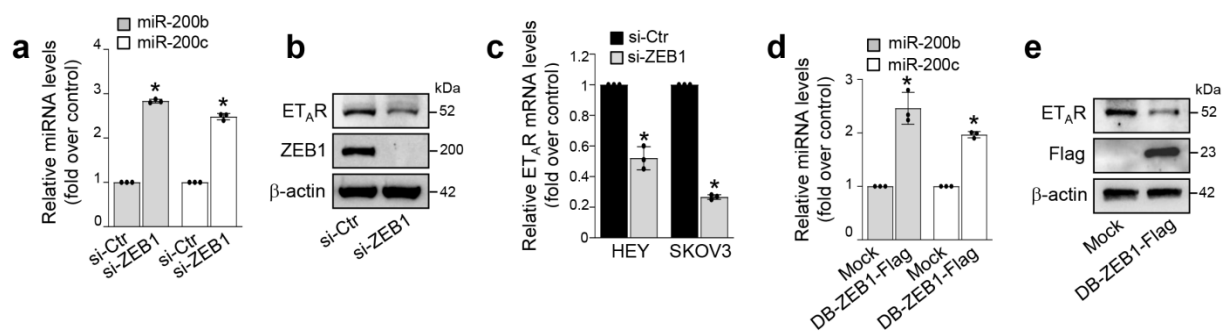

**Supplementary Figure 3. ZEB1 regulates ET<sub>A</sub>R expression through the suppression of miR-200b/c.** **a** Expression of miR-200b/c in SKOV3 cells transfected for 72h with siRNA control (si-Ctr) or si-ZEB1 analyzed by qRT-PCR. U6 is used to normalize. Values are the mean  $\pm$ SD (n=3; \*,  $p < 0.0001$  vs si-Ctr). **b** Expression of ET<sub>A</sub>R and ZEB1 proteins in SKOV3 cells transfected as in **a** and analyzed by WB.  $\beta$ -actin is used as loading control. **c** Expression levels of ET<sub>A</sub>R mRNA in HEY and SKOV3 cells transfected as in **a** evaluated by qRT-PCR and normalized to cyclophilin-A. Values are the mean  $\pm$ SD (n=3; \*,  $p < 0.001$  vs si-Ctr). **d** qRT-PCR analyses to detect miR-200b/c expression in HEY cells transfected with a control plasmid (Mock) or with a Flag-tagged construct able to recognize and block the DNA binding domain of ZEB1 (DB-ZEB1-Flag) for 48h. U6 is used to normalize miRNA expression. Values are the mean  $\pm$ SD (n=3; \*,  $p < 0.01$  vs Mock). **e**

Expression of ET<sub>A</sub>R and Flag proteins in HEY cells transfected as in **d** and analyzed by WB.  $\beta$ -actin is used as loading control.

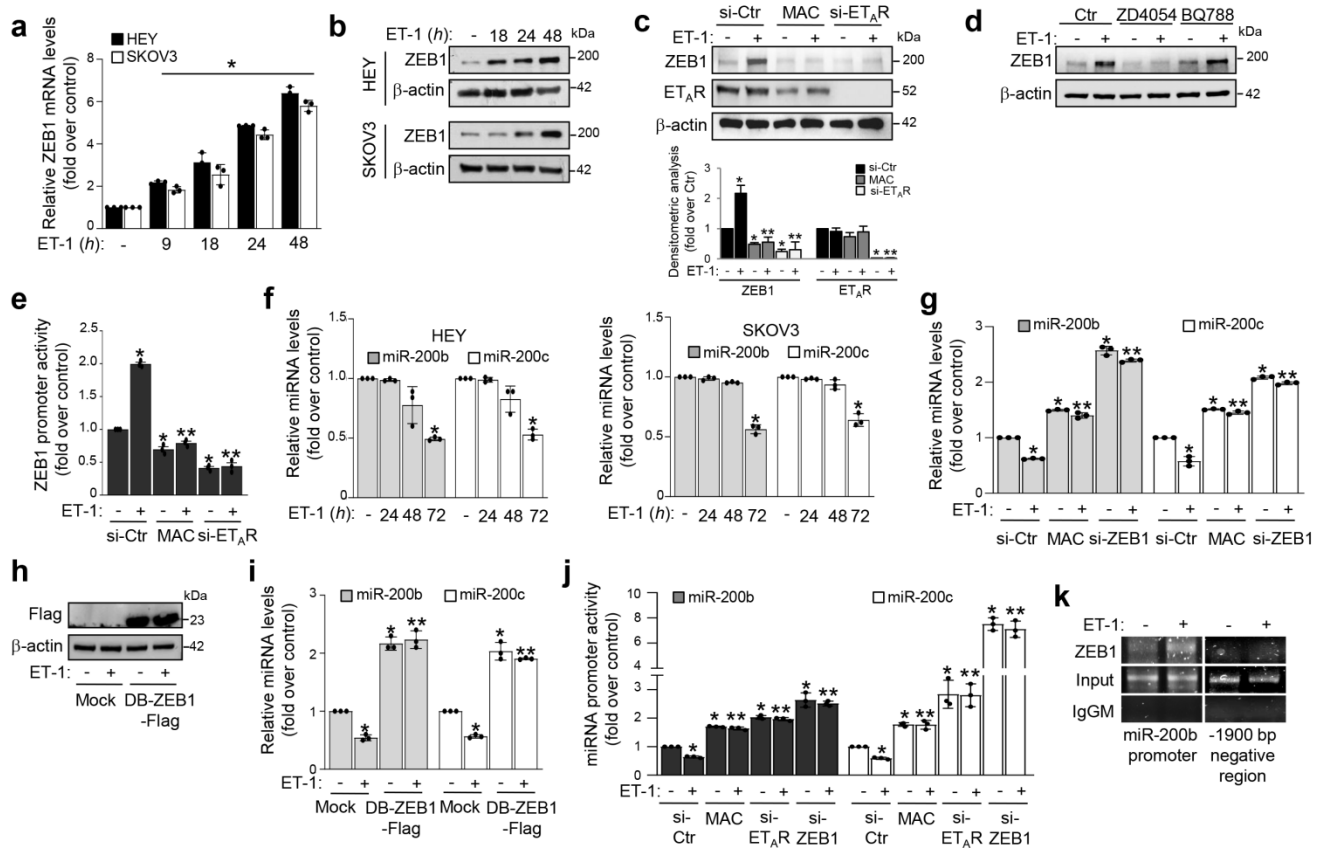

**Supplementary Figure 4. ET-1 downregulates miR-200b/c via ZEB1.** **a, b** ZEB1 mRNA (**a**) and protein (**b**) levels evaluated by qRT-PCR and WB and normalized to cyclophilin-A and  $\beta$ -actin in ET-1-stimulated HEY and SKOV3 cells for different times. Values are the mean  $\pm$ SD ( $n=3$ ; \*,  $p < 0.01$  vs unstimulated cells). **c** Expression of ZEB1 and ET<sub>A</sub>R in HEY cells transfected with si-Ctr, or si-ET<sub>A</sub>R or treated with MAC and stimulated or not with ET-1 for 48h.  $\beta$ -actin is used as loading control. Graph represents the quantification of ZEB1 and ET<sub>A</sub>R expression normalized to  $\beta$ -actin. Value are the mean  $\pm$ SD (\*,  $p < 0.05$  vs si-Ctr; \*\*,  $p < 0.05$  vs ET-1 stimulated si-Ctr). **d** Expression of ZEB1 in HEY cells treated with the selective ET<sub>A</sub>R antagonist ZD4054 (1 $\mu$ M) and the selective ET<sub>B</sub>R antagonist BQ788 (1 $\mu$ M) and stimulated or not with ET-1.  $\beta$ -actin is used as

loading control. **e** Luciferase activity in SKOV3 cells co-transfected for 48h with ZEB1 promoter reporter plasmid and treated as in **c**. Values are the mean  $\pm$ SD (n=3; \*,  $p<0.002$  vs si-Ctr; \*\*,  $p<0.001$  vs ET-1 stimulated si-Ctr). **f** qRT-PCR for miR-200b/c expression in HEY and SKOV3 cells stimulated or not with ET-1 for different times. U6 is used to normalize. Values are the mean  $\pm$ SD (n=3; \*,  $p<0.001$  vs unstimulated cells). **g** qRT-PCR for miR-200b/c expression in SKOV3 cells transfected with si-Ctr or si-ZEB1 or treated with MAC and stimulated with ET-1 for 72h. U6 is used to normalize. Values are the mean  $\pm$ SD (n=3; \*,  $p<0.0001$  vs si-Ctr; \*\*,  $p<0.0001$  vs ET-1-stimulated si-Ctr). **h, i** WB analysis (**h**) and qRT-PCR for miR-200b/c expression (**i**) in HEY cells transfected with a control plasmid (Mock) or with the DB-ZEB1-Flag plasmid for 48h and stimulated or not with ET-1 for 72h.  $\beta$ -actin and U6 are used to normalize. Values are the mean  $\pm$ SD (n=3; \*,  $p<0.001$  vs Mock \*\*,  $p<0.0001$  vs ET-1-stimulated Mock). **j** Luciferase activity in SKOV3 cells co-transfected for 48h with the reporter plasmids for miR-200b/c promoters and si-Ctr, si-ET<sub>A</sub>R or si-ZEB1 or treated with MAC and stimulated or not with ET-1 for 24h. Values are the mean  $\pm$ SD (n=3; \*,  $p<0.003$  vs si-Ctr; \*\*,  $p<0.001$  vs ET-1-stimulated si-Ctr). **k** The binding of ZEB1 on miR-200b promoter region and on a region -1900 bp upstream the miR-200b TSS is analyzed in SKOV3 cells treated or not with ET-1 for 24h by ChIP assays followed by PCR. Anti-IgG mouse (IgGM) Ab is used as control for all ChIP reactions.

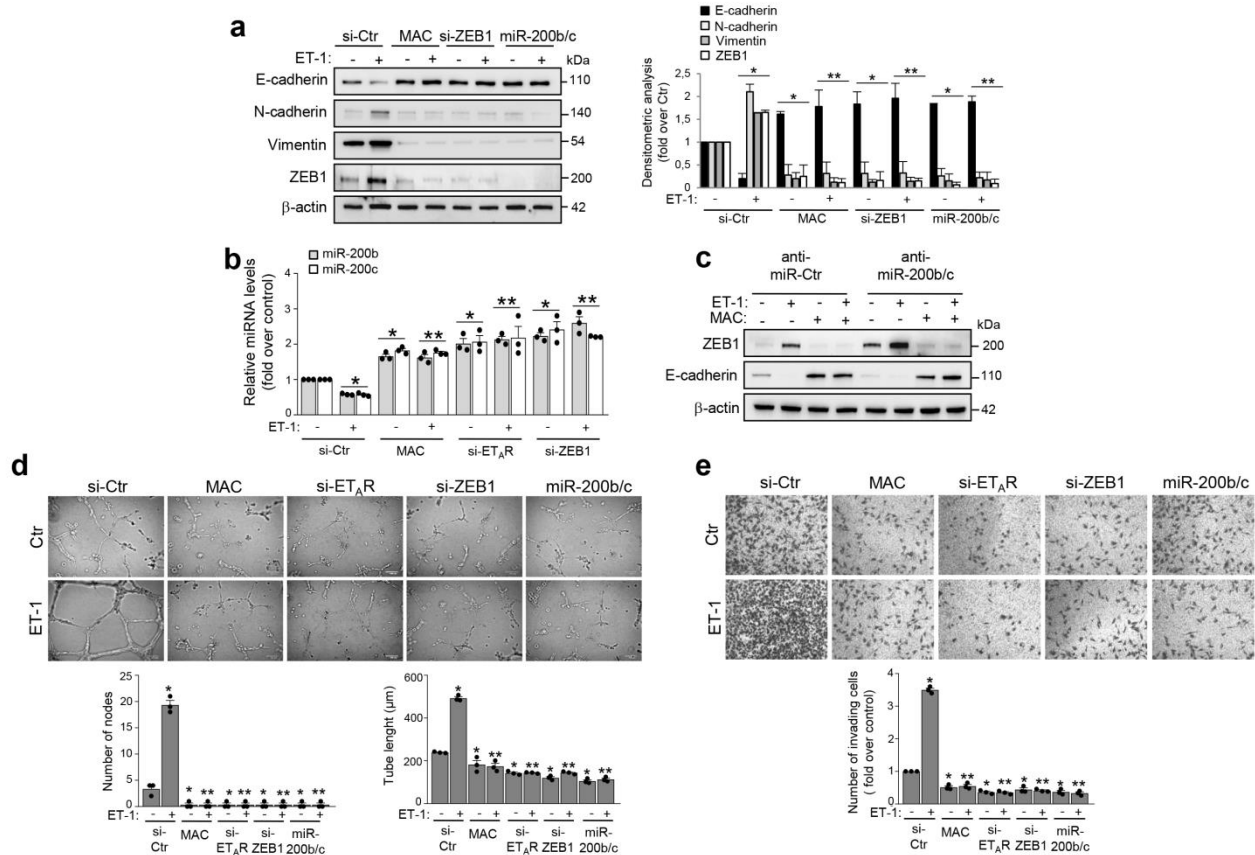

**Supplementary Figure 5. The integrated ET<sub>A</sub>R-miR-200b/c-ZEB1 circuit is involved in ET-1-dependent cell plasticity and invasion.** **a** Expression of E-cadherin, N-cadherin, Vimentin and ZEB1 proteins is analyzed by WB in SKOV3 cells transfected with si-Ctr, si-ZEB1, or mimic-miR-200b/c or treated with MAC and stimulated or not with ET-1.  $\beta$ -actin is used as loading control. Graph represents the densitometric analysis of E-cadherin, N-cadherin, Vimentin and ZEB1 expression normalized to  $\beta$ -actin. Values are the mean  $\pm$ SD expressed as fold induction (\*,  $p < 0.05$  vs si-Ctr; \*\*,  $p < 0.05$  vs ET-1 stimulated si-Ctr). **b** miR-200b/c expression in SKOV3 cells transfected with si-Ctr, si-ET<sub>A</sub>R, si-ZEB1, or mimic-miR-200b/c and treated as in **a** is analyzed by qRT-PCR and normalized to U6. Values are the mean  $\pm$ SD ( $n=3$ ; \*,  $p < 0.004$  vs si-Ctr; \*\*,  $p < 0.002$  vs ET-1 stimulated si-Ctr). **c** Expression of ZEB1 and E-cadherin in SKOV3 cells transfected with anti-miR-Ctr or anti-miR-200b/c and treated or not with MAC and/or stimulated with ET-1.  $\beta$ -actin is used as loading control. **d** Assay of tubule-like structure formation in HEY cells transfected for 48h with siRNA control (si-Ctr), si-ET<sub>A</sub>R, si-ZEB1, or mimic-miR-200b/c (miR-200b/c) or treated

with MAC and overnight stimulated or not with ET-1. Original magnification 20 $\times$ . (Scale bar: 100 $\mu$ m). Graphs represent the number of nodes and the tube length in HEY cells. Columns show the mean  $\pm$ SD (n=3; \*,  $p$ <0.05 vs si-Ctr; \*\*,  $p$ <0.0001 vs ET-1-stimulated si-Ctr). **e** Chemoinvasion assay in HEY cells transfected and stimulated as in **d**. Images represent the crystal violet-stained invasive cells. Magnification x10. Graph represents the number of invading HEY cells. Columns show the mean  $\pm$ SD (n=3; \*,  $p$ <0.001 vs si-Ctr; \*\*,  $p$ <0.0001 vs ET-1-stimulated si-Ctr).

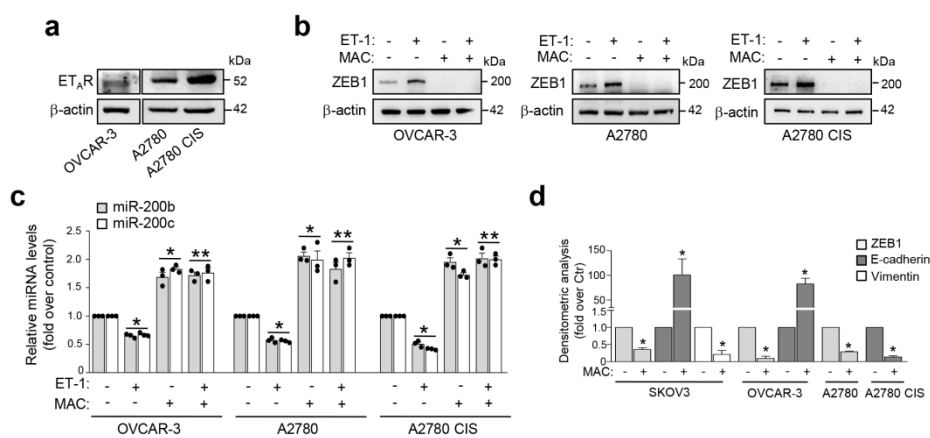

**Supplementary Figure 6. Macitentan hampers ET-1/ZEB1-dependent miR-200b/c transcriptional regulation in high-grade serous and in chemoresistant ovarian cancer cell lines.** **a** Expression of ET<sub>A</sub>R in OVCAR-3, A2780 and A2780 CIS cells. β-actin is used as loading control. **b** Expression of ZEB1 in OVCAR-3, A2780 and A2780 CIS cell treated or not with MAC and/or stimulated with ET-1. β-actin is used as loading control. **c** qRT-PCR for miR-200b/c expression in OVCAR-3, A2780 and A2780 CIS cells treated or not with MAC and/or stimulated with ET-1. U6 is used to normalize. Values are the mean  $\pm$ SD (n=3; \*,  $p$ <0.02 vs unstimulated cells; \*\*,  $p$ <0.02 vs ET-1-stimulated cells). **d** Densitometric analysis of ZEB1, E-cadherin, and Vimentin expression in SKOV3, OVCAR-3, A2780 and A2780 CIS xenografts normalized to β-actin. Values are the mean  $\pm$ SD (\*,  $p$ <0.04 vs Ctr).



**Figure 1a**

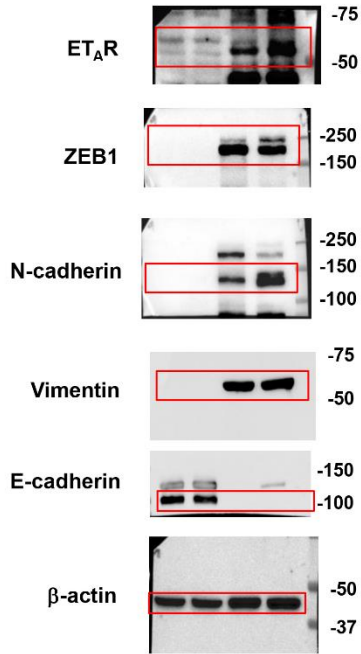

**Figure 2d**

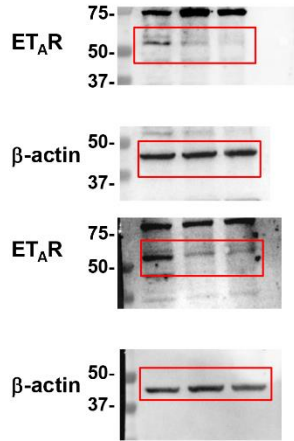

**Figure 2f**

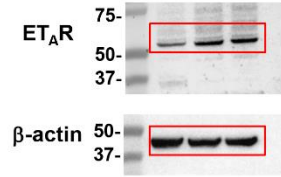

**Figure 2h**

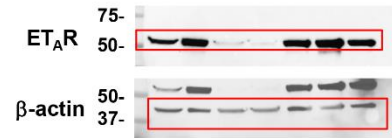

**Figure 3c**

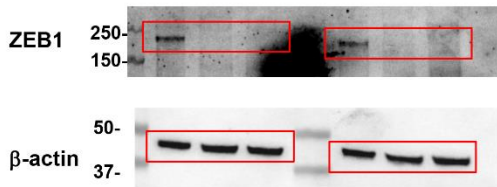

**Figure 3e**

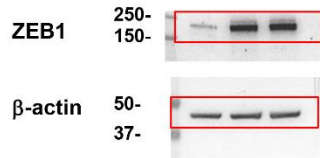

**Figure 4b**

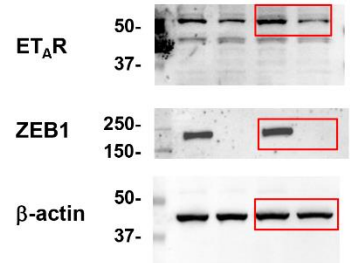

**Figure 4e**

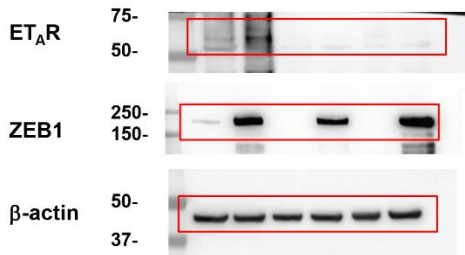

**Figure 5a**

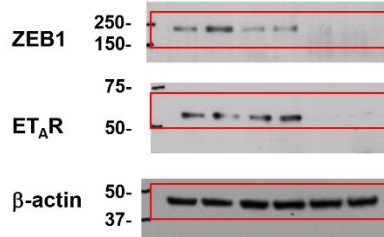

Figure 6a

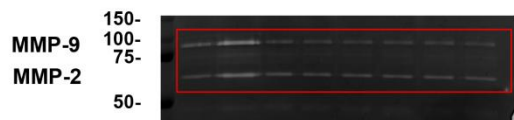

Figure 6b

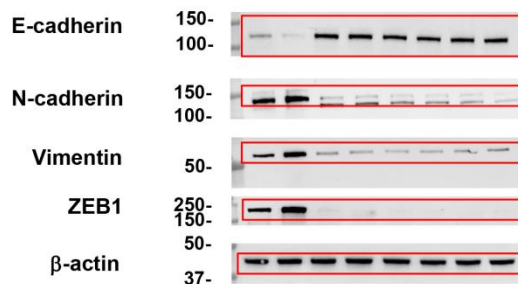

Figure 7c

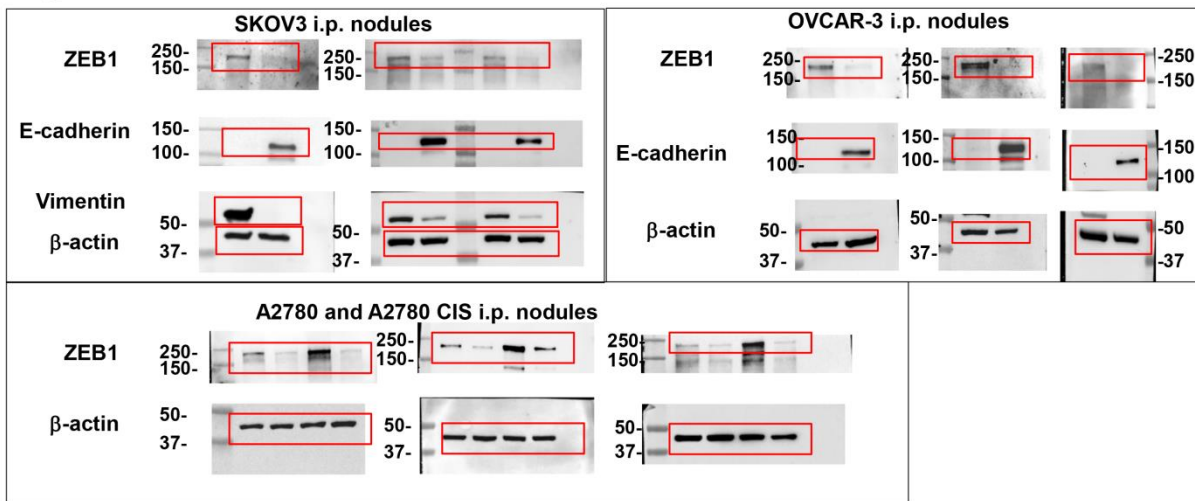

Figure 7f

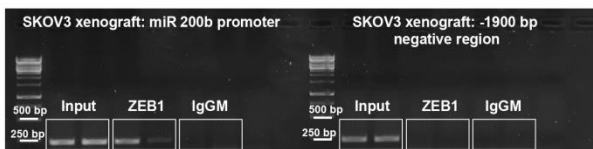

Supplementary Fig. 2c

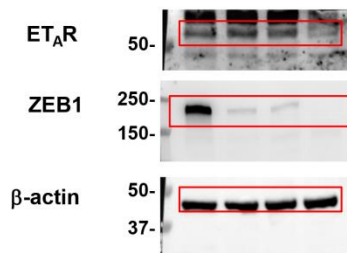

Supplementary Fig. 2d

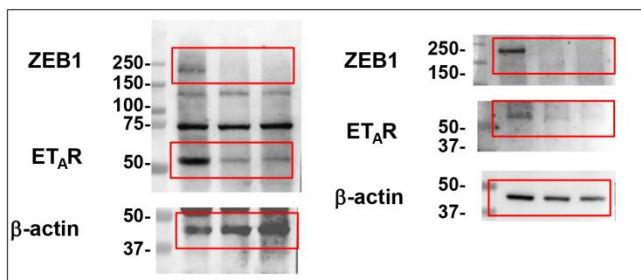

Supplementary Fig. 3b

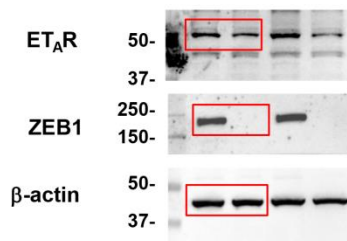

Supplementary Fig. 3e

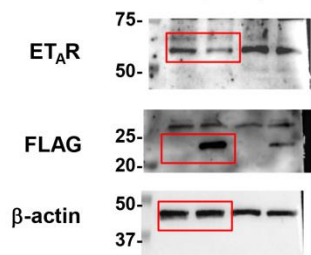

Supplementary Fig. 4b

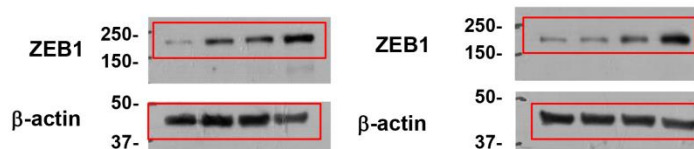

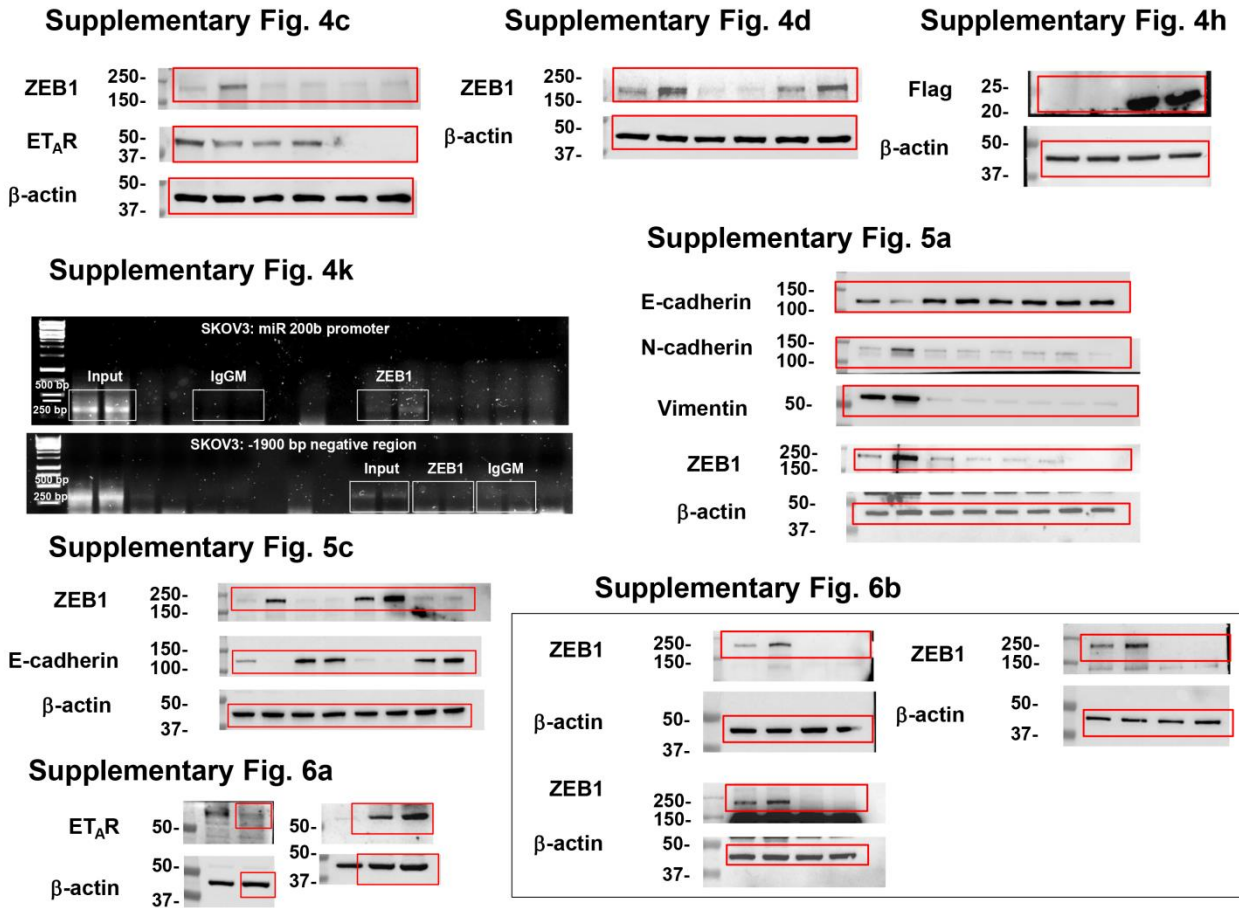

**Supplementary Figure 7.** Uncropped blots of figures 1-7 and supplementary figures 2-6.
