# Supplementary material for: Targeting endothelin 1 receptor-miR-200b/c-ZEB1 circuitry blunts metastatic progression in ovarian cancer
Source: PubMed Central journal article supplement (PMC7666224; doi:10.1038/s42003-020-01404-3), 2020-11-13
Supplement: 42003_2020_1404_MOESM3_ESM.pdf [file 42003_2020_1404_MOESM3_ESM.pdf]

## **Description of Additional Supplementary Files**

File Name: Supplementary Data 1

Description: Source data underlying the graphs in the main figures
